# Supplementary material for: Going Retro, Going Viral: Experiences and Lessons in Drug Discovery from COVID-19
Source: MDPI journal article supplement (doi:10.3390/molecules27123815), 2022-06-14

### Sample loading information for gels shown in Main figures and repeats

**Fig 2CD r1-1:** repeat 1 for Fig. 2C/D. Left to right: no inhibitor, AT9010 (12.5, 25, 50, 100, 200  $\mu$ M), STP (12.5, 25, 50, 100, 200  $\mu$ M), GTP (12.5, 25, 50, 100, 200  $\mu$ M).

**Fig 2CD r1-2:** repeat 1 for Fig. 2C/D. Left to right: no inhibitor, 2'N3-GTP (12.5, 25, 50, 100, 200  $\mu$ M), 2'N3-UTP (12.5, 25, 50, 100, 200  $\mu$ M), RTP (12.5, 25, 50, 100, 200  $\mu$ M).

**Fig 2CD r2:** repeat 2 for Fig. 2C/D. Top gel, left to right: no inhibitor, AT9010 (12.5, 25, 50, 100  $\mu$ M), STP (12.5, 25, 50, 100  $\mu$ M), RTP (12.5, 25, 50, 100  $\mu$ M); Bottom gel, left to right: 2'N3-GTP (12.5, 25, 50, 100  $\mu$ M), 2'N3-UTP (12.5, 25, 50, 100  $\mu$ M), GTP (12.5, 25, 50, 100  $\mu$ M).

**Fig 2CD r3:** repeat 3 for Fig. 2C/D. Top gel, left to right: no inhibitor, AT9010 (12.5, 25, 50, 100  $\mu$ M), STP (12.5, 25, 50, 100  $\mu$ M), RTP (12.5, 25, 50, 100  $\mu$ M); Bottom gel, left to right: 2'N3-GTP (12.5, 25, 50, 100  $\mu$ M), 2'N3-UTP (12.5, 25, 50, 100  $\mu$ M), GTP (12.5, 25, 50, 100  $\mu$ M).

**Fig 3B r1:** Fig. 3B repeat 1. Left to right: no inhibitor, 1% DMSO, AT-DP, AT-TP, SDP, STP, AT-DP, AT-TP, SDP, STP, AT-DP, AT-TP, SDP, STP.

**Fig 3B r2:** Fig. 3B repeat 2. Left to right: no inhibitor, TOB, RUT, empty lane, no inhibitor, TOB, RUT, empty lane, TOB, RUT.

**Fig 4C:** the gel shown in Fig. 4C. All relevant lanes are labeled; numbers after inhibitor names correspond to  $\mu$ M. No inhibitor control = DMSO. To make the figure, the panels were rearranged to match the order of inhibitors in other panels. In addition, the panels with another control inhibitor were removed.

**Fig 4D r1:** Fig. 4D repeat 1. Lane 1 to 10: No RdRp, 1% DMSO, RFB (100, 300  $\mu$ M), FDX (50, 150  $\mu$ M), RPN (100, 300  $\mu$ M), SUR (10, 30  $\mu$ M).

**Fig 4D r2:** Fig. 4D repeat 2. Lane 1 to 10: No RdRp, 1% DMSO, RFB (100, 300  $\mu$ M), FDX (50, 150  $\mu$ M), RPN (100, 300  $\mu$ M), SUR (10, 30  $\mu$ M).

**Fig 4D r3:** Fig. 4D repeat 3. Lane 1 to 10: No RdRp, 1% DMSO, RFB (100, 300  $\mu$ M), FDX (50, 150  $\mu$ M), RPN (100, 300  $\mu$ M), SUR (10, 30  $\mu$ M).

**Fig 4E r1:** Fig. 4E repeat 1. Lane 1 to 9: 1% DMSO, RFB (100, 300  $\mu$ M), FDX (50, 150  $\mu$ M), RPN (100, 300  $\mu$ M), SUR (10, 30  $\mu$ M).

Lane 10 to 18: 1% DMSO, RFB (100, 300  $\mu$ M), FDX (50, 150  $\mu$ M), RPN (100, 300  $\mu$ M), SUR (10, 30  $\mu$ M).

**Fig 4E r2:** Fig. 4E repeat 2. Left to right: 1% DMSO, RFB (100, 300  $\mu$ M), FDX (50, 150  $\mu$ M), RPN (100, 300  $\mu$ M), SUR (10, 30  $\mu$ M).

**Fig 5B:** the gel shown in Fig. 5B; Fig. 5B\_r2 and \_r3 are repeats. All lanes are labeled on images. None = DMSO.

File/Range: F:\Original gels\Fig 2CD r1-1.gel / 0.000-4965 Counts /Magnification - 1.47  
User Name: Artsimovitch Lab  
Image Name: F:\Original gels\Fig 2CD r1-1.gel  
Image Comment: Mode=Phosphorimaging  
Method=[Phosphor]  
Laser=635nm  
Filter=[IP] (ch.1)  
PMT Type=BiAlkali  
PMT=ch.1,800V  
Shading=IP\_2011-02-28T14\_59\_40  
Inverted=NO  
Stage=Phosphor Stage  
MainOffset=25mm  
SubOffset=25mm

Present Date/Time: 2022-06-01 17:07:50

Fig. 2CD r1-1

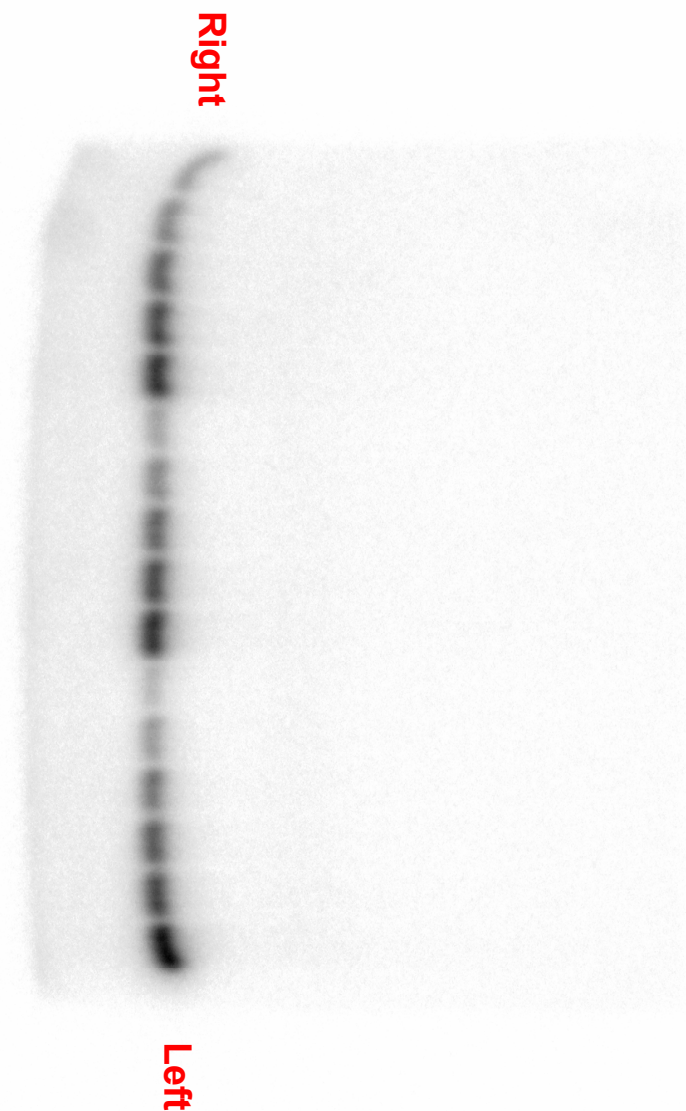

File/Range: F:\Original gels\Fig 2CD r1-2.gel / 0.000-7492 Counts /Magnification - 1.47  
User Name: Artsimovitch Lab  
Image Name: F:\Original gels\Fig 2CD r1-2.gel  
Image Comment: Mode=Phosphorimaging  
Method=[Phosphor]  
Laser=635nm  
Filter=[IP] (ch.1)  
PMT Type=Bialkali  
PMT=ch.1,800V  
Shading=IP\_2011-02-28T14\_59\_40  
Inverted=NO  
Stage=Phosphor Stage  
MainOffset=25mm  
SubOffset=25mm

Present Date/Time: 2022-06-01 17:08:39

Fig. 2CD r1-2

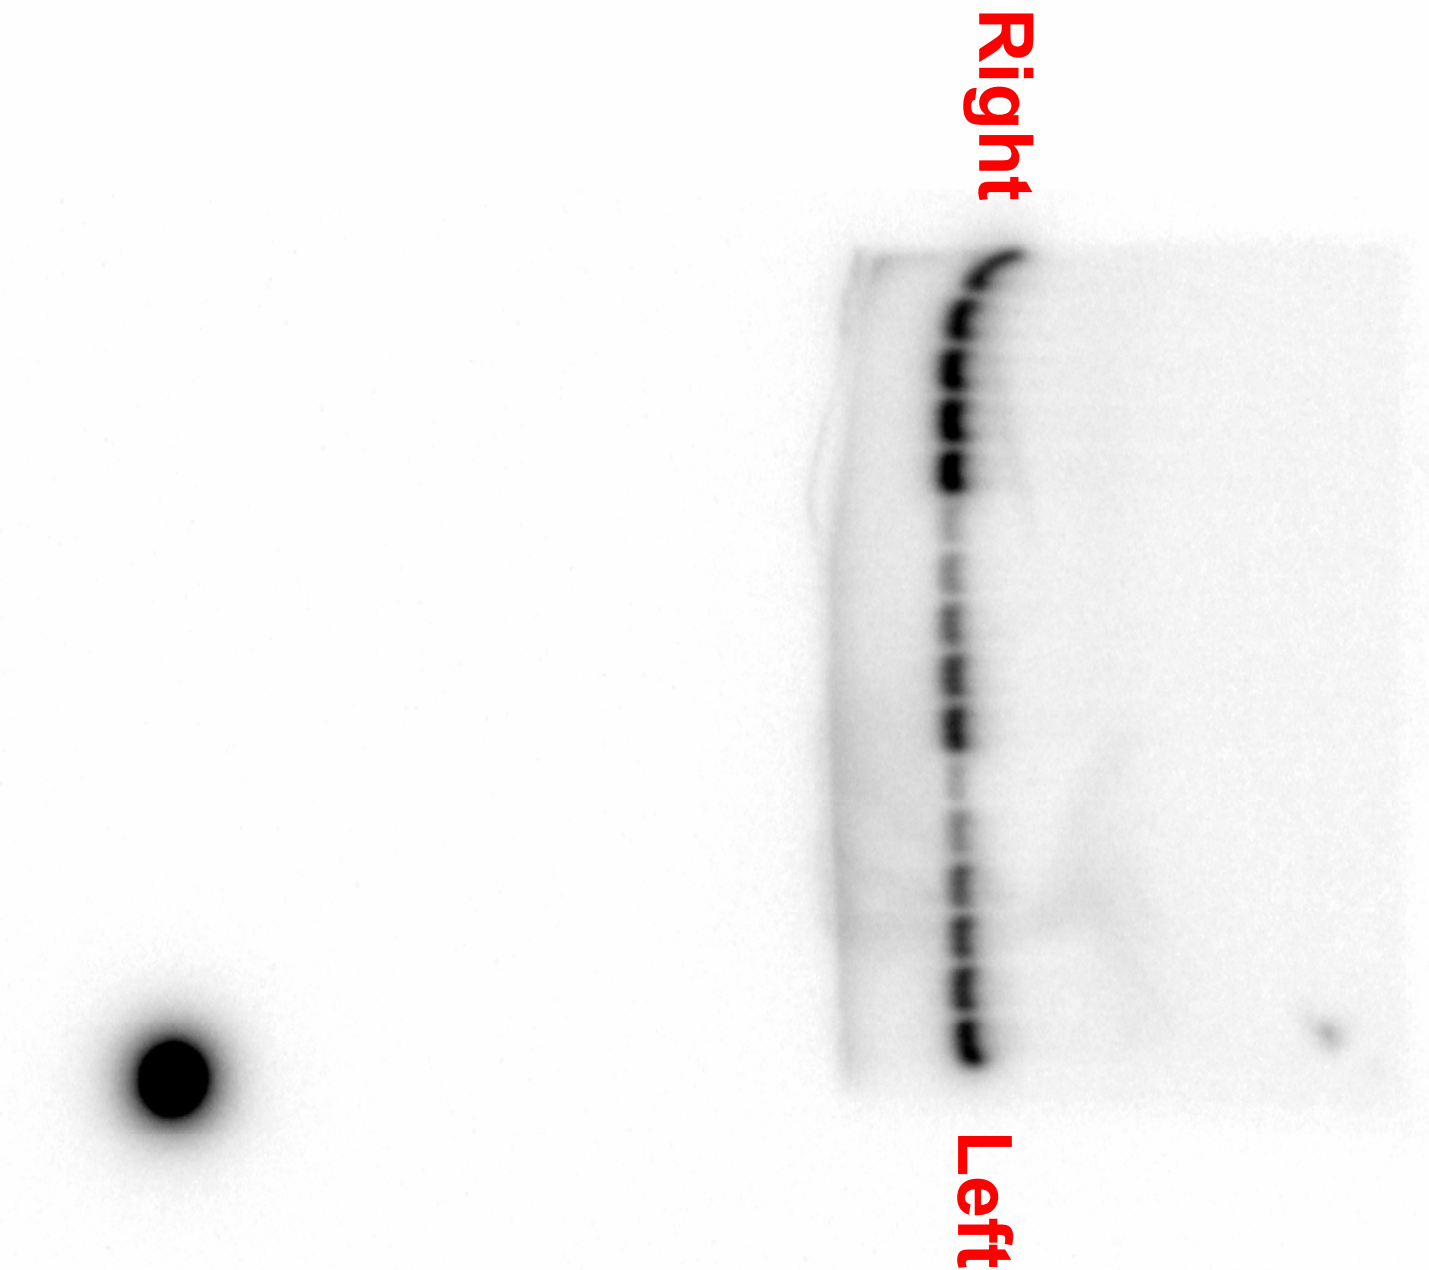

File/Range: F:\Original gels\Fig 2CD r2.gel / 0.000-3742 Counts /Magnification - 1.00

User Name: Artsimovitch Lab

Image Name: F:\Original gels\Fig 2CD r2.gel

Image Comment: Mode=Phosphorimaging  
Method=[Phosphor]  
Laser=635nm  
Filter=[IP] (ch.1)  
PMT Type=Bialkali  
PMT=ch.1,800V  
Shading=IP\_2011-02-28T14\_59\_40  
Inverted=NO  
Stage=Phosphor Stage  
MainOffset=25mm  
SubOffset=25mm

Present Date/Time: 2022:06:01 17:16:28

Scan Date/Time: 2022:03:16 14:51:27

Prep. Date/Time: 2022:03:16 14:51:27

Fig. 2CD r3

Bottom gel

Top gel

Right

Right

Left

Left

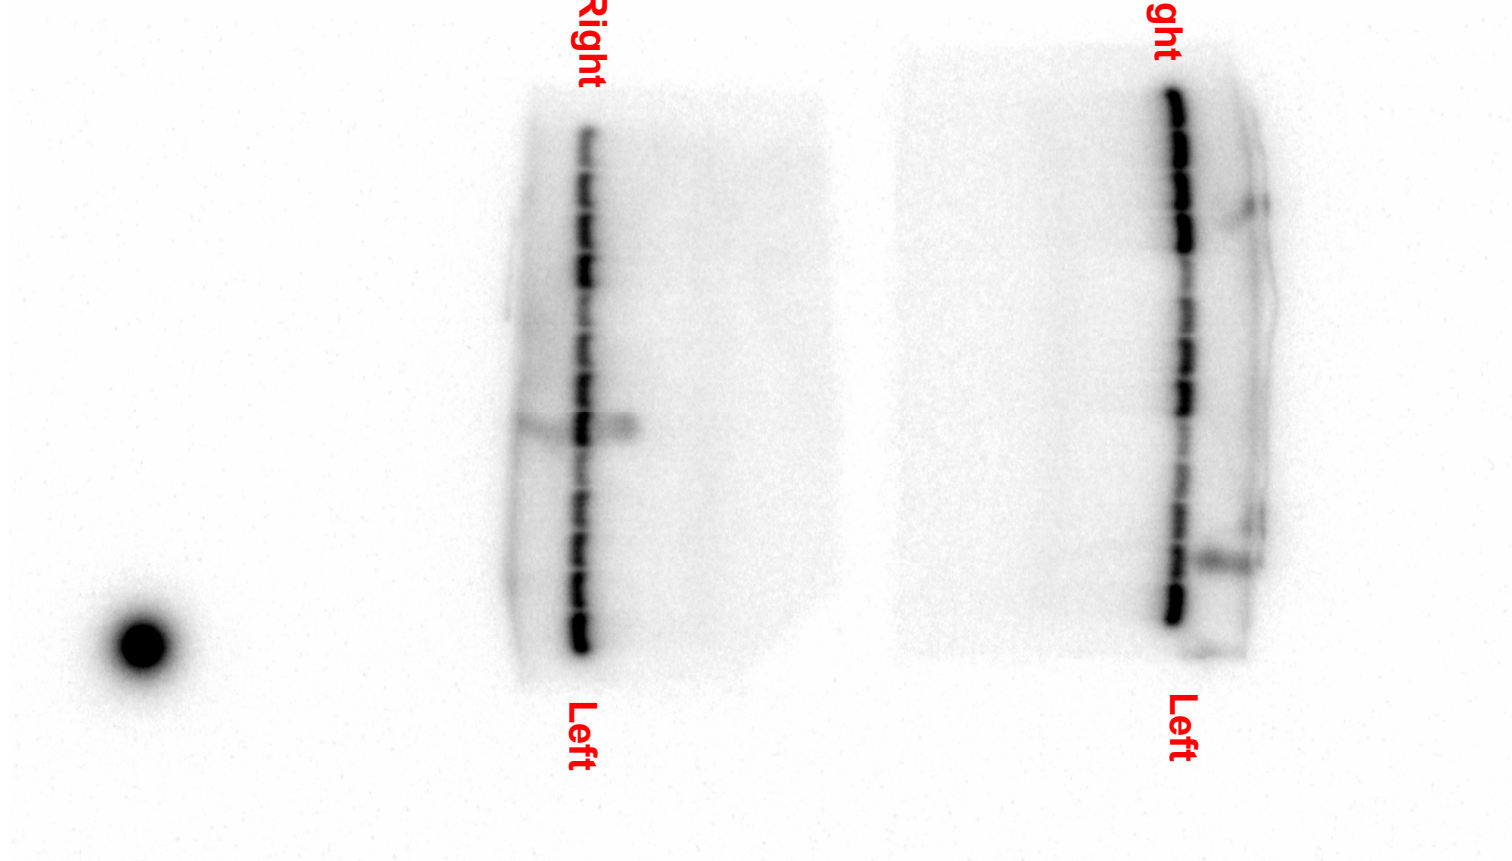



File/Range: F:\Original gels\Fig 2CD r3.gel / 0.000-1997 Counts /Magnification - 1.00

User Name: Artsimovitch Lab

Image Name: F:\Original gels\Fig 2CD r3.gel

Image Comment: Mode=Phosphorimaging  
Method=[Phosphor]  
Laser=635nm  
Filter=[IP] (ch.1)  
PMT Type=Bialkali  
PMT=ch.1,800V  
Shading=IP\_2011-02-28T14\_59\_40  
Inverted=NO  
Stage=Phosphor Stage  
MainOffset=25mm  
SubOffset=25mm

Present Date/Time: 2022:06:01 17:16:54

Scan Date/Time: 2022:03:16 16:07:30

Prep. Date/Time: 2022:03:16 16:07:30

Fig. 2CD r4

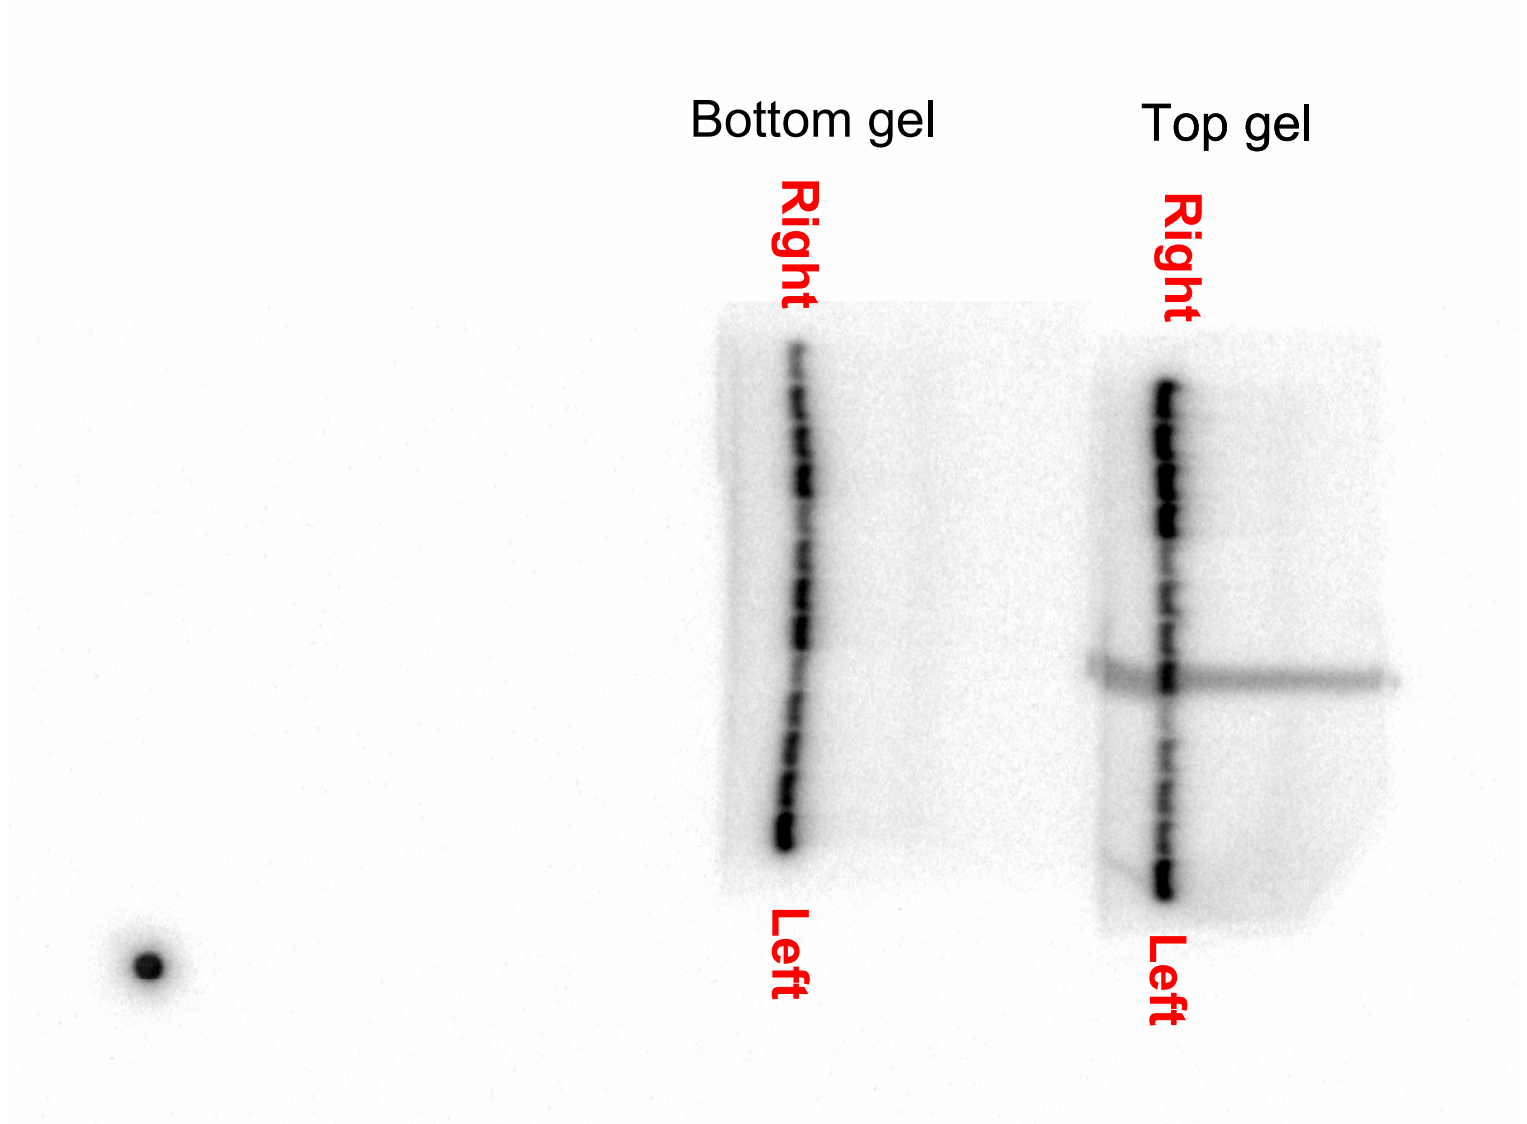

File/Range: F:\Original gels\Fig 3B r1.gel / 0.000-357.6 Counts /Magnification - 1.47  
User Name: Artsimovitch Lab  
Image Name: F:\Original gels\Fig 3B r1.gel  
Image Comment: Mode=Phosphorimaging  
Method=[Phosphor]  
Laser=635nm  
Filter=[IP] (ch.1)  
PMT Type=Bialkali  
PMT=ch.1,650V  
Shading=IP\_2011-02-28T14\_59\_40  
Inverted=NO  
Stage=Phosphor Stage  
MainOffset=25mm  
SubOffset=25mm

Fig. 3B r1

Present Date/Time: 2022-06-01 17:09:46

Left  
Right



File/Range: F:\Original gels\Fig 3B r2.gel / 0.000-11950 Counts /Magnification - 1.47  
User Name: Artsimovitch Lab  
Image Name: F:\Original gels\Fig 3B r2.gel  
Image Comment: Mode=Phosphorimaging  
Method=[Phosphor]  
Laser=635nm  
Filter=[IP] (ch.1)  
PMT Type=Bialkali  
PMT=ch.1,650V  
Shading=IP\_2011-02-28T14\_59\_40  
Inverted=NO  
Stage=Phosphor Stage  
MainOffset=25mm  
SubOffset=25mm

Present Date/Time: 2022-06-01 17:10:03

Fig. 3B r2

Left

Right

File/Range: F:\Original gels\Fig 4C.gel / 48.08-5616 Counts /Magnification - 0.50

User Name: Artsimovitch Lab

Image Name: F:\Original gels\Fig 4C.gel

Image Comment: Mode=Fluorescence  
Method=[Cy5]  
Laser=635nm  
Filter=[LPR] (ch.1)  
PMT Type=Bialkali  
PMT=ch.1,900V  
Shading=635-Ch1\_2011-02-28T09\_24\_36  
Inverted=NO  
Stage=Fluorescence Stage  
MainOffset=0mm  
SubOffset=50mm

Present Date/Time: 2022:06:01 17:19:23

Scan Date/Time: 2022:03:16 15:33:28

Prep. Date/Time: 2022:03:16 15:33:28

Fig. 4C

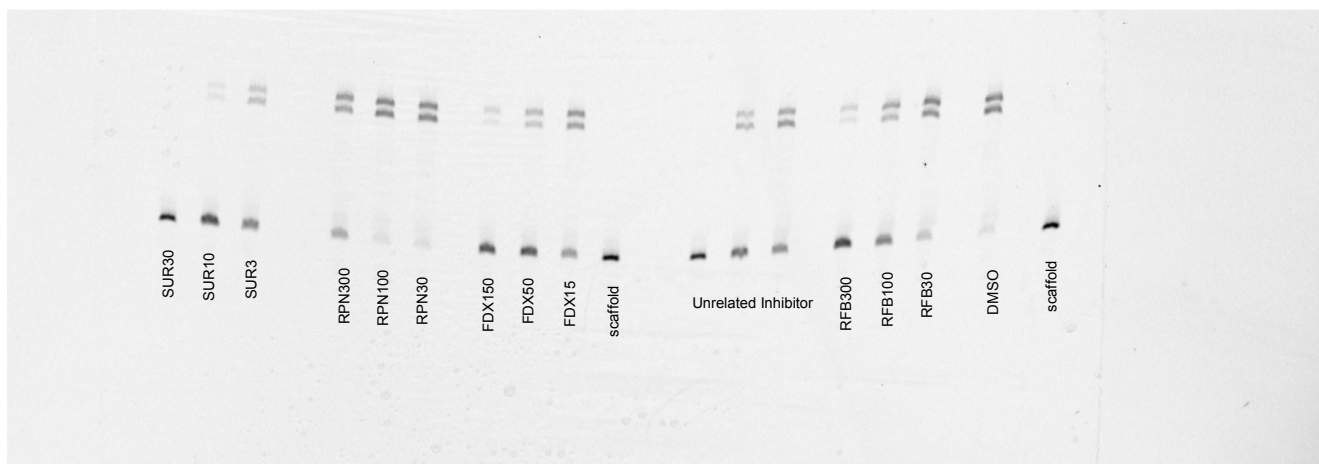

File/Range: F:\Original gels\Fig 4D r1.gel / 14.64-10002 Counts /Magnification - 1.00

User Name: Artsimovitch Lab

Image Name: F:\Original gels\Fig 4D r1.gel

Image Comment: Mode=Fluorescence  
Method=[Cy5]  
Laser=635nm  
Filter=[LPR] (ch.1)  
PMT Type=Bialkali  
PMT=ch.1,800V  
Shading=635-Ch1\_2011-02-28T09\_24\_36  
Inverted=NO  
Stage=Fluorescence Stage  
MainOffset=25mm  
SubOffset=25mm

Present Date/Time: 2022:06:01 17:20:55

Scan Date/Time: 2022:03:21 13:09:49

Prep. Date/Time: 2022:03:21 13:09:49

Fig. 4D r1

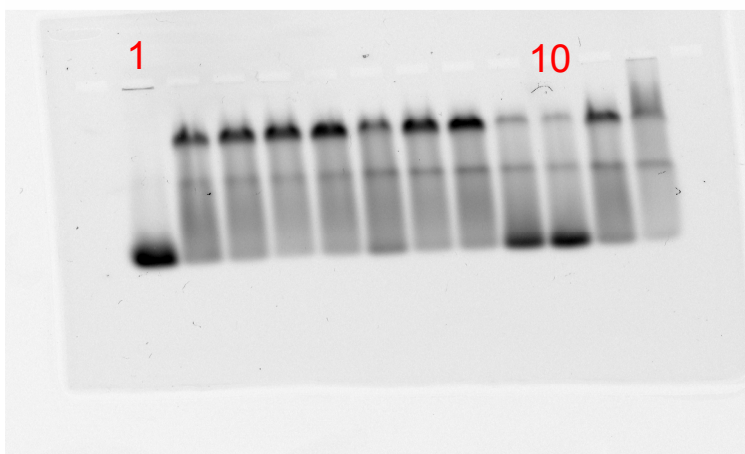

File/Range: F:\Original gels\Fig 4D r2.gel / 58.20-5190 Counts /Magnification - 1.00

User Name: Artsimovitch Lab

Image Name: F:\Original gels\Fig 4D r2.gel

Image Comment: Mode=Fluorescence  
Method=[Cy5]  
Laser=635nm  
Filter=[LPR] (ch.1)  
PMT Type=Bialkali  
PMT=ch.1,800V  
Shading=635-Ch1\_2011-02-28T09\_24\_36  
Inverted=NO  
Stage=Fluorescence Stage  
MainOffset=25mm  
SubOffset=25mm

Present Date/Time: 2022:06:01 17:21:21

Scan Date/Time: 2022:03:22 12:43:28

Prep. Date/Time: 2022:03:22 12:43:28

Fig. 4D r2

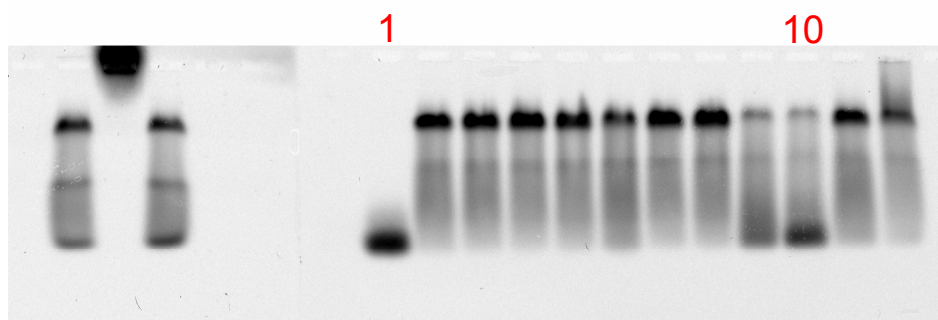

File/Range: F:\Original gels\Fig 4D r3.gel / 134.8-22797 Counts /Magnification - 2.21  
User Name: Artsimovitch Lab  
Image Name: F:\Original gels\Fig 4D r3.gel  
Image Comment: Mode=Fluorescence  
Method=[Cy5]  
Laser=635nm  
Filter=[LPR] (ch.1)  
PMT Type=Bialkali  
PMT=ch.1,900V  
Shading=635-Ch1\_2011-02-28T09\_24\_36  
Inverted=NO  
Stage=Fluorescence Stage  
MainOffset=25mm  
SubOffset=25mm

Present Date/Time: 2022-06-01 17:11:19  
Scan Date/Time  
Prep. Date/Time

Fig. 4D r3

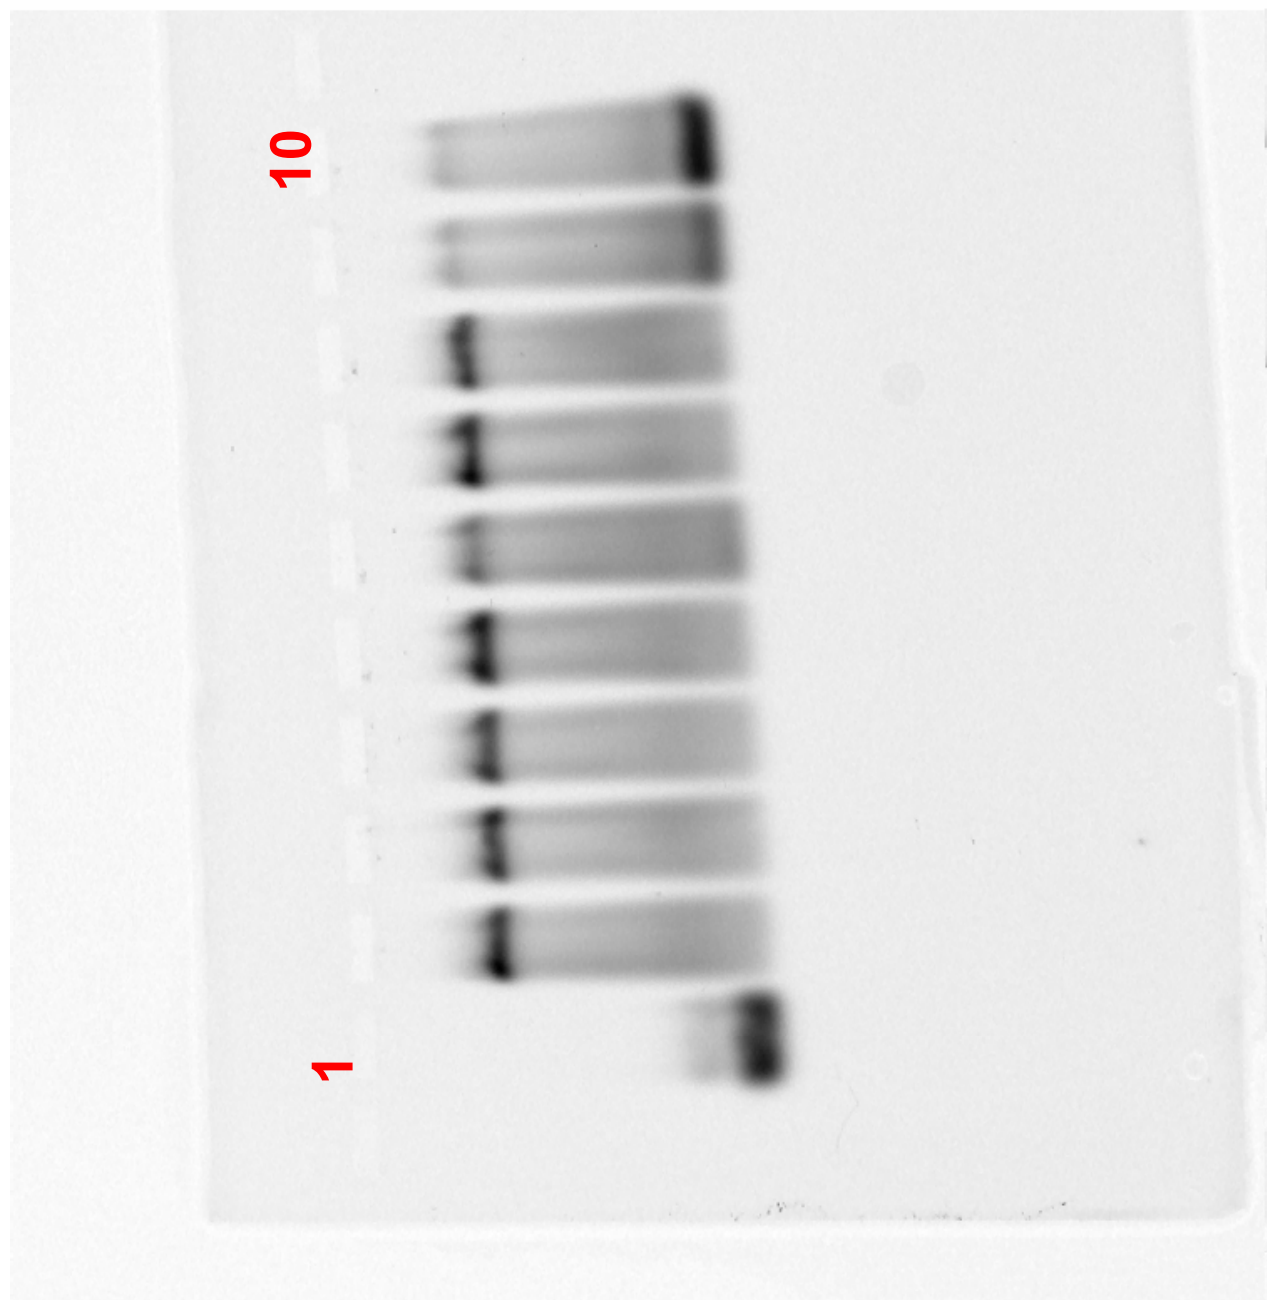



File/Range: F:\Original gels\Fig 4E r1.gel / 0.201-1270 Counts /Magnification - 1.00

User Name: Artsimovitch Lab

Image Name: F:\Original gels\Fig 4E r1.gel

Image Comment: Mode=Phosphorimaging  
Method=[Phosphor]  
Laser=635nm  
Filter=[IP] (ch.1)  
PMT Type=Bialkali  
PMT=ch.1,800V  
Shading=IP\_2011-02-28T14\_59\_40  
Inverted=NO  
Stage=Phosphor Stage  
MainOffset=25mm  
SubOffset=25mm

Present Date/Time: 2022:06:01 17:21:47

Scan Date/Time: 2022:03:22 12:54:30

Prep. Date/Time: 2022:03:22 12:54:30

Fig. 4E r1

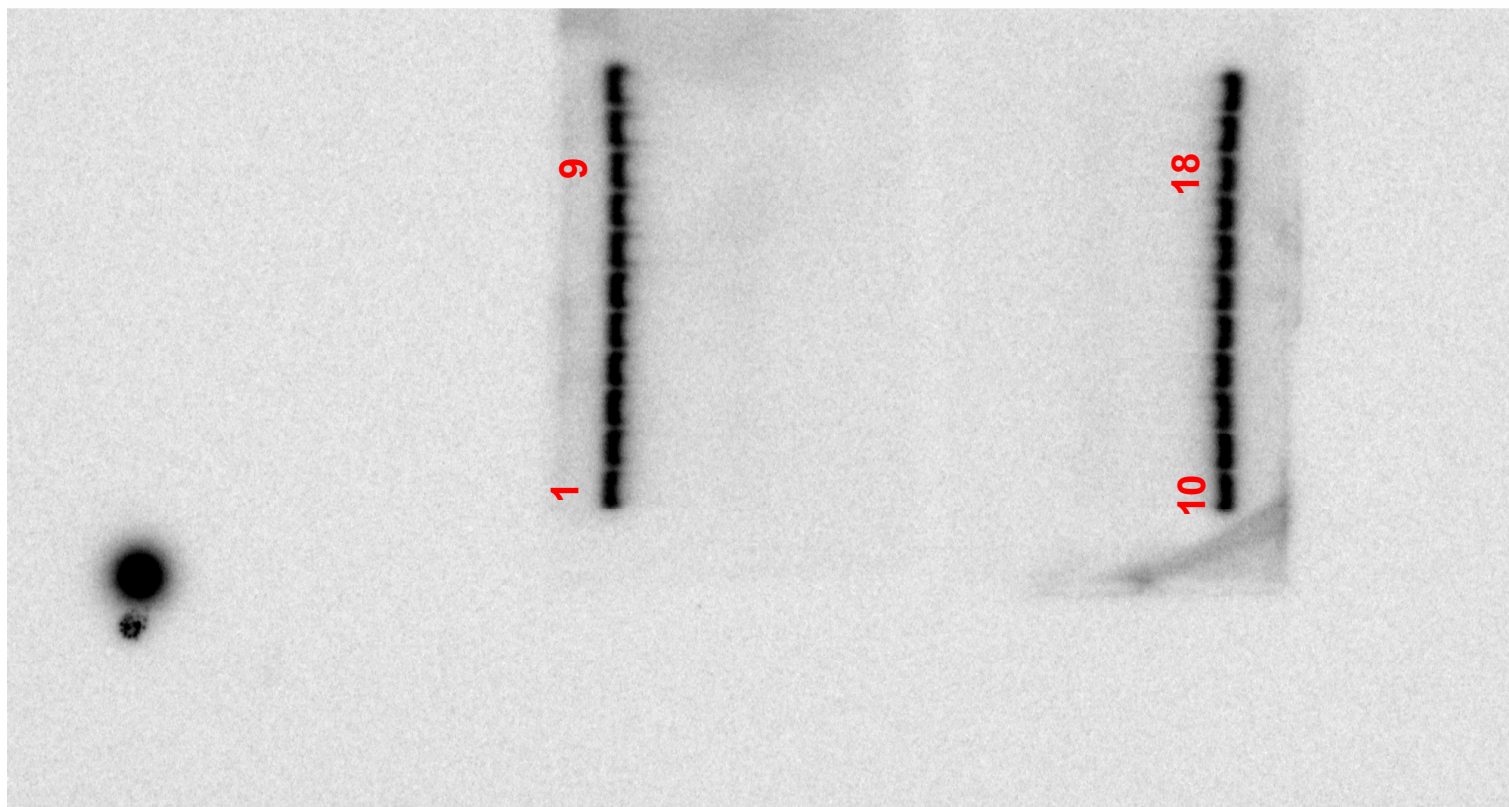

File/Range: F:\Original gels\Fig 4E r2.gel / 0.000-4853 Counts /Magnification - 1.11  
User Name: Artsimovitch Lab  
Image Name: F:\Original gels\Fig 4E r2.gel  
Image Comment: Mode=Phosphorimaging  
Method=[Phosphor]  
Laser=635nm  
Filter=[IP] (ch.1)  
PMT Type=Bialkali  
PMT=ch.1,650V  
Shading=IP\_2011-02-28T14\_59\_40  
Inverted=NO  
Stage=Phosphor Stage  
MainOffset=25mm  
SubOffset=25mm

Present Date/Time: 2022-06-01 17:11:57

Fig. 4E r2

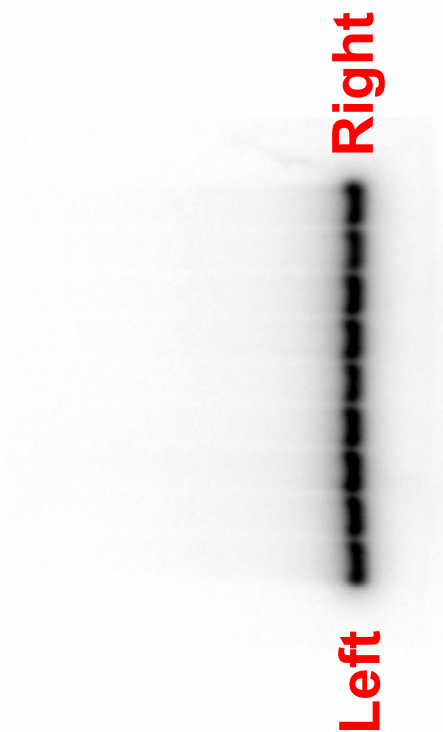

File/Range: F:\Original gels\Fig 5B.gel / 128.3-2801 Counts /Magnification - 0.50

User Name: Artsimovitch Lab

Image Name: F:\Original gels\Fig 5B.gel

Image Comment: Mode=Fluorescence  
Method=[Cy5]  
Laser=635nm  
Filter=[LPR] (ch.1)  
PMT Type=Bialkali  
PMT=ch.1,1000V  
Shading=635-Ch1\_2011-02-28T09\_24\_36  
Inverted=NO  
Stage=Fluorescence Stage  
MainOffset=0mm  
SubOffset=25mm

Present Date/Time: 2022:06:01 17:23:17

Scan Date/Time: 2022:03:18 13:24:34

Prep. Date/Time: 2022:03:18 13:24:34

Fig. 5B

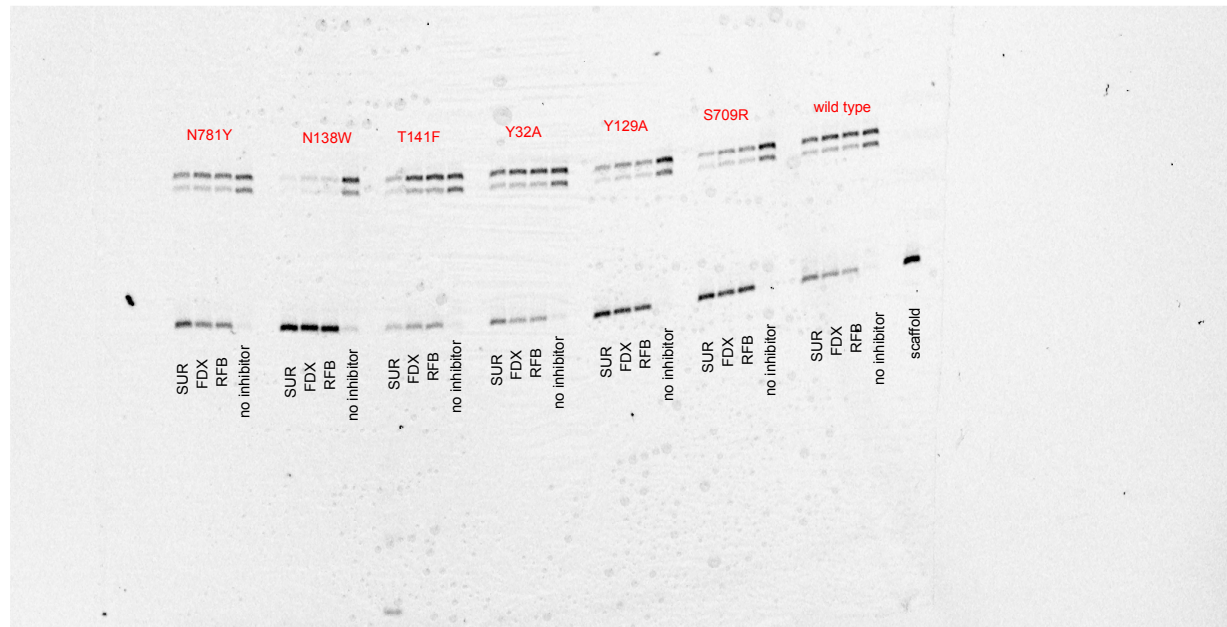

File/Range: F:\Original gels\Fig 5B\_R2.gel / 39.23-5001 Counts /Magnification - 0.50

User Name: Artsimovitch Lab

Image Name: F:\Original gels\Fig 5B\_R2.gel

Image Comment: Mode=Fluorescence  
Method=[Cy5]  
Laser=635nm  
Filter=[LPR] (ch.1)  
PMT Type=Bialkali  
PMT=ch.1,900V  
Shading=635-Ch1\_2011-02-28T09\_24\_36  
Inverted=NO  
Stage=Fluorescence Stage  
MainOffset=0mm  
SubOffset=0mm

Present Date/Time: 2022:06:01 17:23:42

Scan Date/Time: 2022:03:17 11:29:30

Prep. Date/Time: 2022:03:17 11:29:30

Fig. 5B r1

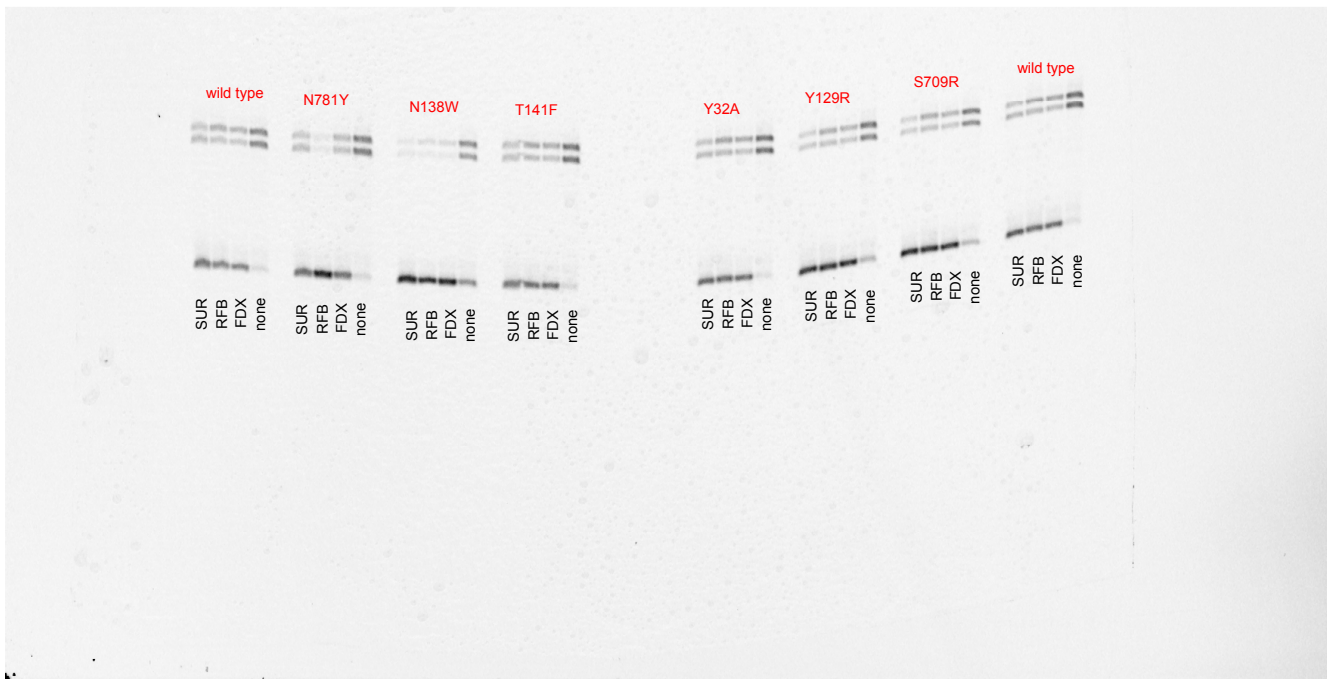

File/Range: F:\Original gels\Fig 5B\_R3.gel / 122.2-2404 Counts /Magnification - 0.50

User Name: Artsimovitch Lab

Image Name: F:\Original gels\Fig 5B\_R3.gel

Image Comment: Mode=Fluorescence  
Method=[Cy5]  
Laser=635nm  
Filter=[LPR] (ch.1)  
PMT Type=Bialkali  
PMT=ch.1,900V  
Shading=635-Ch1\_2011-02-28T09\_24\_36  
Inverted=NO  
Stage=Fluorescence Stage  
MainOffset=0mm  
SubOffset=25mm

Present Date/Time: 2022:06:01 17:23:59

Scan Date/Time: 2022:03:17 16:27:15

Prep. Date/Time: 2022:03:17 16:27:15

Fig. 5B r2

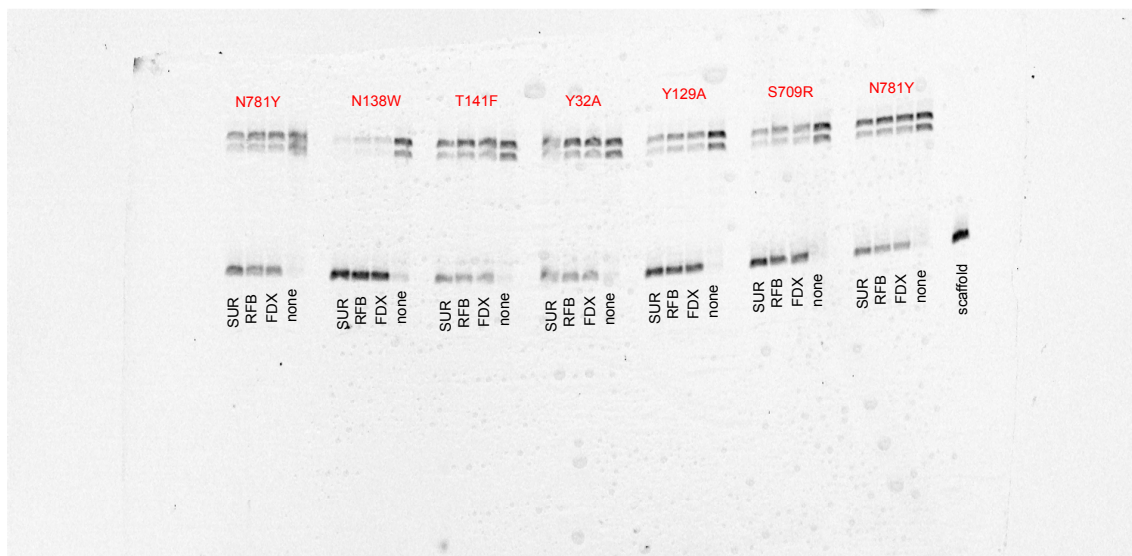

Supplement: s1 [file s1]
