# Supplementary material for: Going Retro, Going Viral: Experiences and Lessons in Drug Discovery from COVID-19
Source: MDPI journal article supplement (doi:10.3390/molecules27123815), 2022-06-14
Supplement: s1 [file s1]

**Table S1. Plasmids**

| <b>Name</b> | <b>Key features/sequence</b>                     | <b>Source; Addgene#</b> |
|-------------|--------------------------------------------------|-------------------------|
| pIA1362     | T7 promoter–His <sub>8</sub> -GB1-TEV-nsp7       | [25]; 166860            |
| pIA1363     | T7 promoter–His <sub>8</sub> -GB1-TEV-nsp8       | [25]; 166861            |
| pIA1414     | T7 promoter–His <sub>10</sub> -SUMO-nsp9         | [23]; 172402            |
| pIA1400     | T7 promoter–His <sub>10</sub> -SUMO-nsp12        | [23]; 172519            |
| pIA1401     | T7 promoter–His <sub>10</sub> -SUMO-nsp12[S709R] | This work               |
| pIA1402     | T7 promoter–His <sub>10</sub> -SUMO-nsp12[Y129A] | [25]; 172403            |
| pIA1403     | T7 promoter–His <sub>10</sub> -SUMO-nsp12[Y32A]  | This work               |
| pIA1407     | T7 promoter–His <sub>10</sub> -SUMO-nsp12[T141F] | This work               |
| pIA1411     | T7 promoter–His <sub>10</sub> -SUMO-nsp12[N138W] | This work               |
| pIA1417     | T7 promoter–His <sub>10</sub> -SUMO-nsp12[N781Y] | This work               |
